# Supplementary material for: The influence of internal pressure and neuromuscular agents on C. elegans biomechanics: an empirical and multi-compartmental in silico modelling study
Source: PubMed Central journal article supplement (PMC10978802; doi:10.3389/fbioe.2024.1335788), 2024-03-15

# Supplementary Figure 1

**a**

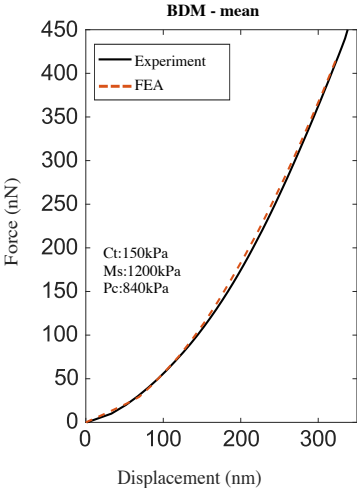

**b**

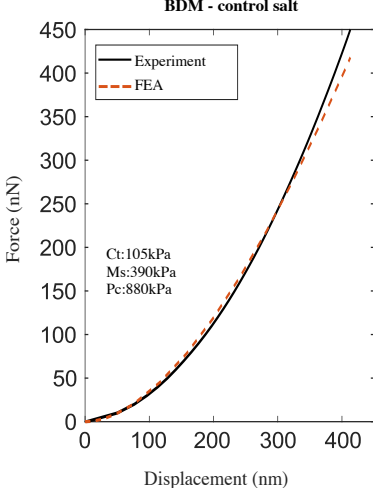

**c**

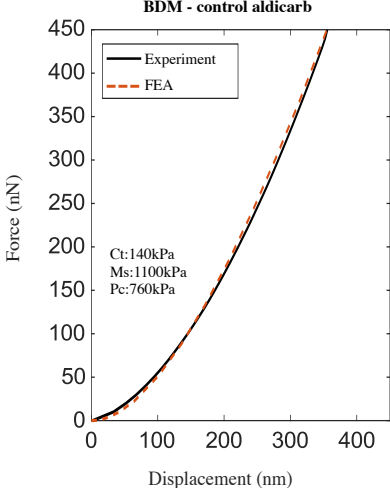

Supplement: Image1.pdf [file Image1.pdf]
