# Supplementary material for: The influence of internal pressure and neuromuscular agents on C. elegans biomechanics: an empirical and multi-compartmental in silico modelling study
Source: PubMed Central journal article supplement (PMC10978802; doi:10.3389/fbioe.2024.1335788), 2024-03-15

# Supplementary Figure 3

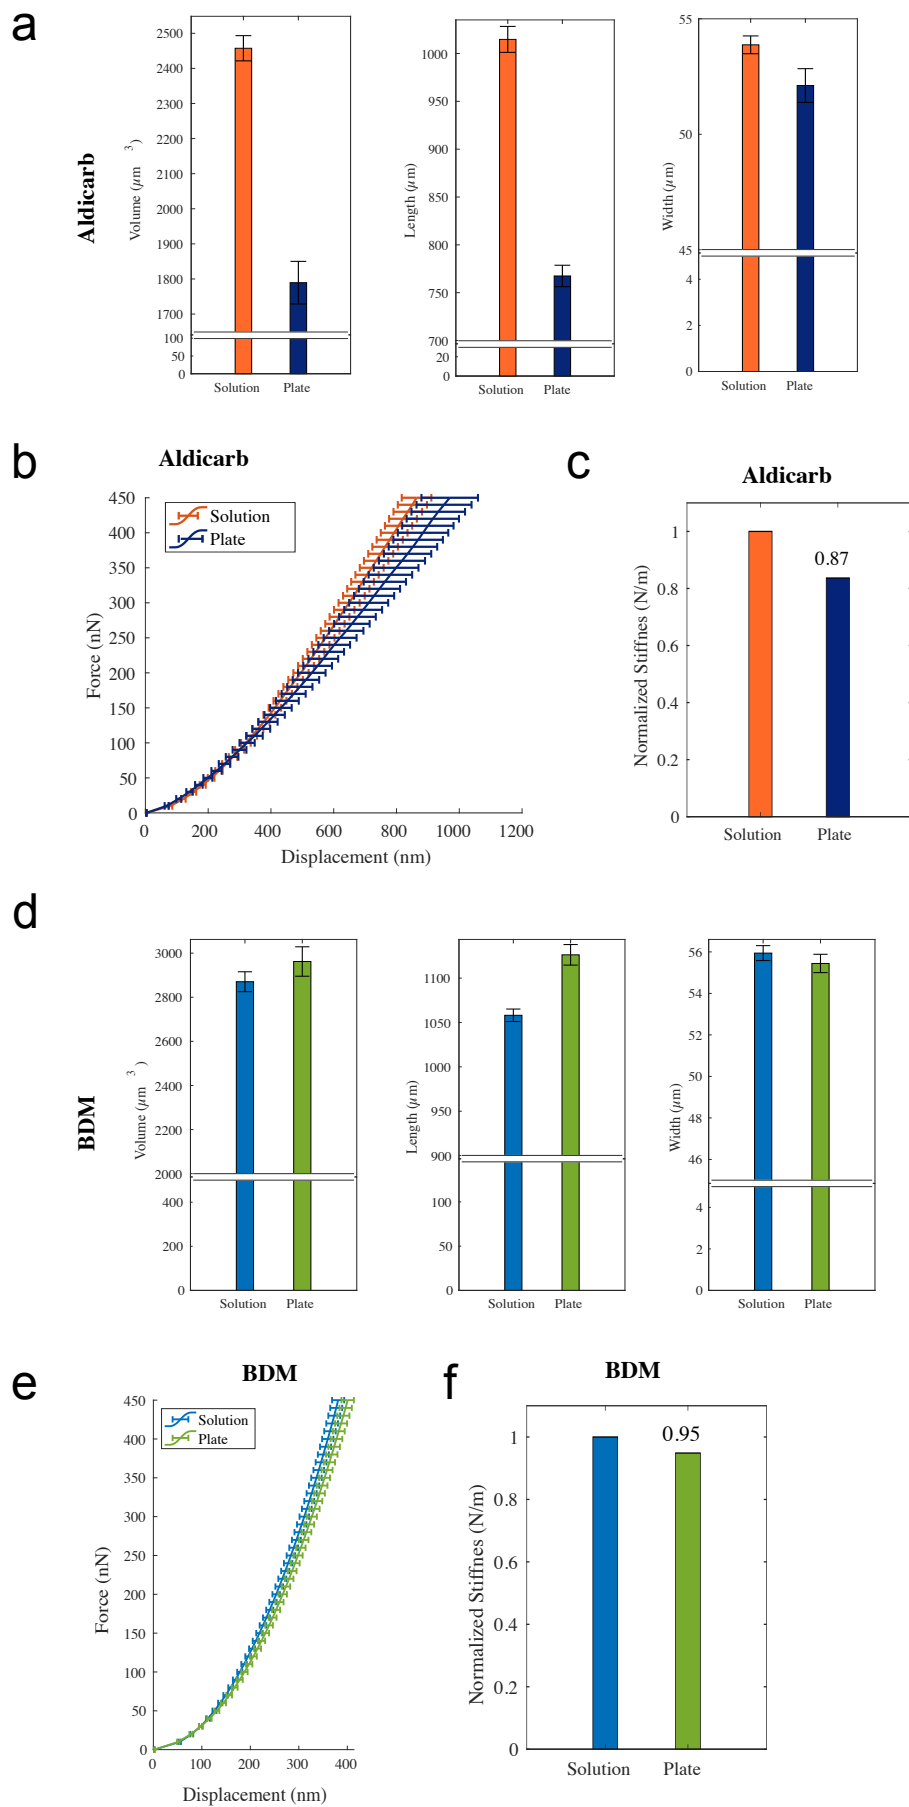

Supplement: Image3.pdf [file Image3.pdf]
