# Supplementary material for: The influence of internal pressure and neuromuscular agents on C. elegans biomechanics: an empirical and multi-compartmental in silico modelling study
Source: PubMed Central journal article supplement (PMC10978802; doi:10.3389/fbioe.2024.1335788), 2024-03-15

# Supplementary Figure 4

**a**

Micro-Force-Displacement System ( $\mu$ FDS)

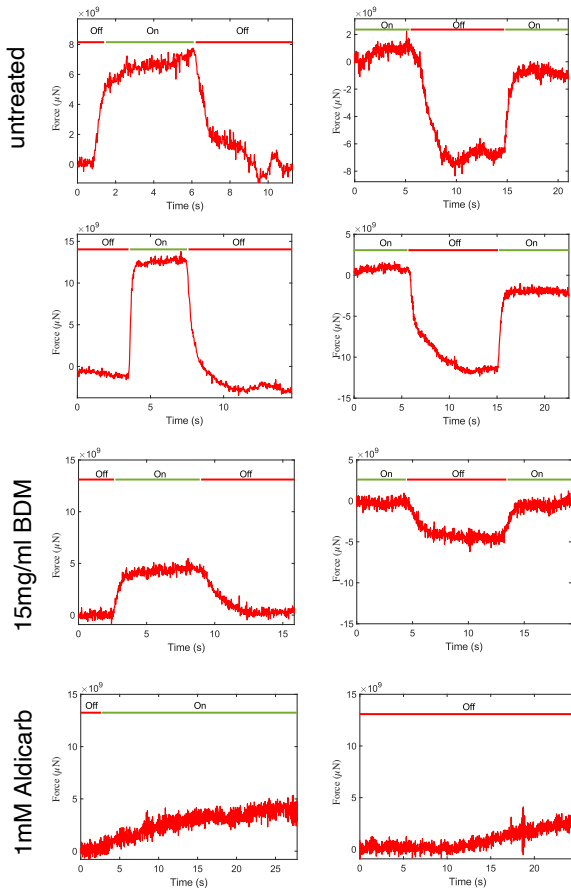

**b**

atomic force microscope

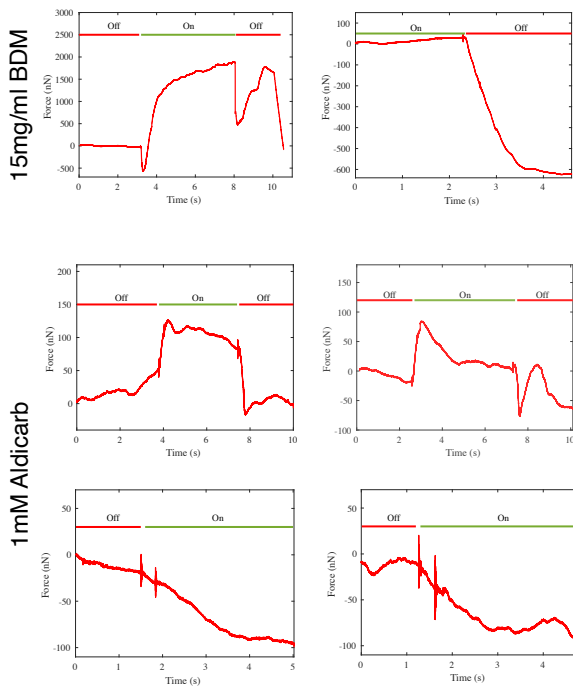

Supplement: Image4.pdf [file Image4.pdf]
