# Supplementary material for: The influence of internal pressure and neuromuscular agents on C. elegans biomechanics: an empirical and multi-compartmental in silico modelling study
Source: PubMed Central journal article supplement (PMC10978802; doi:10.3389/fbioe.2024.1335788), 2024-03-15

# Supplementary Figure 5

**a**

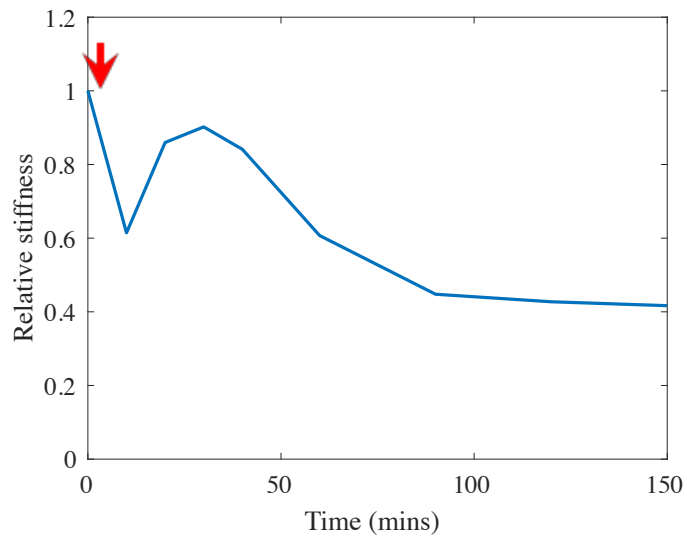

**b**

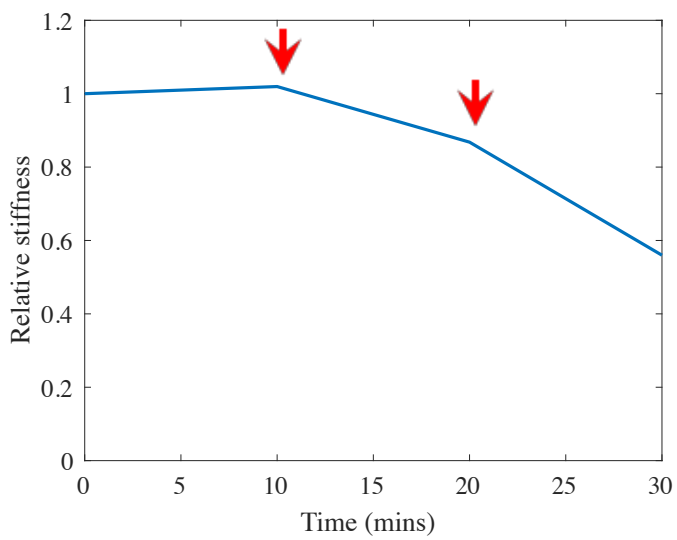

Supplement: Image5.pdf [file Image5.pdf]
